# Supplementary material for: Sunlight-driven fast photo-degradation of Eriochrome Black T dye using highly efficient La-doped Ag3PO4 decorated with ZnS QDs
Source: Royal Society of Chemistry journal article supplement (doi:10.1039/d6ra00544f), 2026-05-05
Supplement: d6ra00544f1.pdf [file d6ra00544f1.pdf]

**Sun-Light Driven Fast Photo-Degradation of Eriochrome Black T Dye using Highly Efficient La-Doped  $\text{Ag}_3\text{PO}_4$  Decorated with ZnS QDs**

***Shabana Bibi<sup>1</sup>, Amna Bashir<sup>2</sup>, Noshabah Tabassum<sup>1</sup>, It Ee Lee<sup>3,4\*</sup>, Hafsa Yasmeen<sup>2</sup>, Syed Mustansar Abbas<sup>6</sup>, Qamar Wali<sup>3,4</sup>, Muhammad Aamir,<sup>5</sup> Chingmai Ko<sup>7</sup>, Imtiaz Ahmad<sup>\*7</sup>***

***<sup>1</sup> Department of Environment Sciences, Fatima Jinnah Women University, The Mall, Rawalpindi, 46000, Pakistan***

***<sup>2</sup> Department of Chemistry, Fatima Jinnah Women University, The Mall, Rawalpindi, 46000, Pakistan***

***<sup>3</sup> Faculty of Artificial Intelligence and Engineering, Multimedia University, 63100 Cyberjaya, Malaysia***

***<sup>4</sup> Centre for Smart Systems and Automation, COE for Robotics and Sensing Technologies, Multimedia University, 63100 Cyberjaya, Selangor, Malaysia***

***<sup>5</sup> Department of Chemistry, Mirpur University of Science and Technology (MUST), Mirpur-10250 (AJK), Pakistan***

***<sup>6</sup> Department of Chemistry, College of Science, Imam Abdulrahman Bin Faisal University, P.O. Box 1982, Dammam, Saudi Arabia***

***<sup>7</sup> School of Electronics and Communication Engineering, Quanzhou University of Information Engineering, Quanzhou, 362000, China.***

***\*Corresponding: [amnabashir79@yahoo.com](mailto:amnabashir79@yahoo.com), [ielee@mmu.edu.my](mailto:ielee@mmu.edu.my),***

**Figure. S1. Experimental Setup for (a) Adsorption experiment, (b) Photocatalytic degradation.**

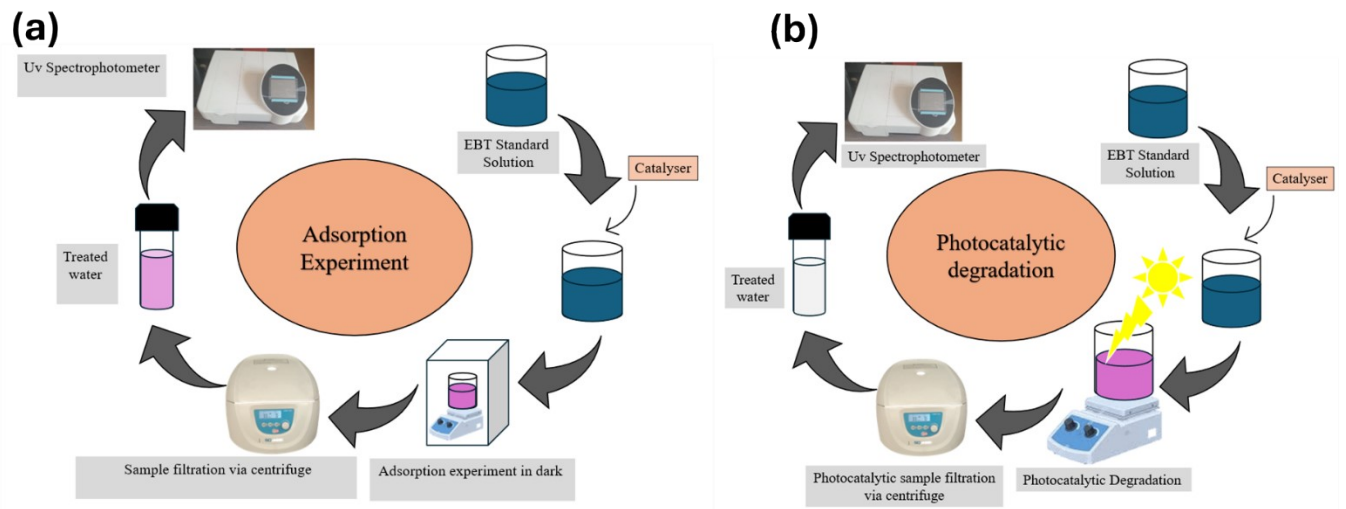

**Table S1: XRD parameters of synthesized materials**

| <b>Sample Name</b>                                  | <b>2<math>\theta</math></b> | <b>FWHM<br/>(<math>^{\circ}</math>)</b> | <b>Average<br/>Crystalline<br/>size (nm)</b> | <b>Dislocation<br/>Density<br/><math>\delta = 1/D^2</math></b> | <b>Microstrain<br/><math>\varepsilon = \beta / (4\tan\theta)</math></b> |
|-----------------------------------------------------|-----------------------------|-----------------------------------------|----------------------------------------------|----------------------------------------------------------------|-------------------------------------------------------------------------|
| <b>ZnS QDs</b>                                      | 29.2                        | 4.0881                                  | 2.26                                         | 0.210                                                          | 0.0465                                                                  |
|                                                     | 48.53                       | 3.2886                                  |                                              |                                                                |                                                                         |
|                                                     | 57.52                       | 4.9258                                  |                                              |                                                                |                                                                         |
| <b>Ag<sub>3</sub>PO<sub>4</sub></b>                 | 20.96                       | 0.09103                                 | 158.13                                       | 4.62326E-05                                                    | 0.000749                                                                |
|                                                     | 29.77                       | 0.05438                                 |                                              |                                                                |                                                                         |
|                                                     | 33.39                       | 0.05361                                 |                                              |                                                                |                                                                         |
|                                                     | 36.66                       | 0.04913                                 |                                              |                                                                |                                                                         |
|                                                     | 42.57                       | 0.04059                                 |                                              |                                                                |                                                                         |
|                                                     | 47.89                       | 0.05095                                 |                                              |                                                                |                                                                         |
|                                                     | 52.78                       | 0.05452                                 |                                              |                                                                |                                                                         |
|                                                     | 55.11                       | 0.04934                                 |                                              |                                                                |                                                                         |
|                                                     | 57.38                       | 0.05365                                 |                                              |                                                                |                                                                         |
| <b>2% La-doped<br/>Ag<sub>3</sub>PO<sub>4</sub></b> | 20.96                       | 0.13979                                 | 73.07                                        | 0.000262602                                                    | 0.001773                                                                |
|                                                     | 29.79                       | 0.14077                                 |                                              |                                                                |                                                                         |
|                                                     | 33.39                       | 0.12758                                 |                                              |                                                                |                                                                         |
|                                                     | 36.68                       | 0.157                                   |                                              |                                                                |                                                                         |
|                                                     | 42.55                       | 0.26199                                 |                                              |                                                                |                                                                         |
|                                                     | 47.91                       | 0.10533                                 |                                              |                                                                |                                                                         |
|                                                     | 52.78                       | 0.09436                                 |                                              |                                                                |                                                                         |
|                                                     | 55.11                       | 0.09603                                 |                                              |                                                                |                                                                         |
|                                                     | 57.38                       | 0.10398                                 |                                              |                                                                |                                                                         |
| <b>6% La-doped<br/>Ag<sub>3</sub>PO<sub>4</sub></b> | 20.98                       | 0.09519                                 | 118                                          | 9.02064E-05                                                    | 0.001088                                                                |
|                                                     | 29.79                       | 0.11711                                 |                                              |                                                                |                                                                         |
|                                                     | 33.41                       | 0.06976                                 |                                              |                                                                |                                                                         |
|                                                     | 36.68                       | 0.07329                                 |                                              |                                                                |                                                                         |
|                                                     | 42.59                       | 0.09446                                 |                                              |                                                                |                                                                         |
|                                                     | 47.91                       | 0.06409                                 |                                              |                                                                |                                                                         |
|                                                     | 52.8                        | 0.07397                                 |                                              |                                                                |                                                                         |
|                                                     | 55.13                       | 0.07953                                 |                                              |                                                                |                                                                         |
|                                                     | 57.4                        | 0.08013                                 |                                              |                                                                |                                                                         |
| <b>Ag<sub>3</sub>PO<sub>4</sub>/ZnS<br/>QDs</b>     | 20.22                       | 4.46288                                 | 10.33                                        | 0.03986                                                        | 0.018548                                                                |
|                                                     | 29.02                       | 2.4354                                  |                                              |                                                                |                                                                         |
|                                                     | 31.53                       | 0.52277                                 |                                              |                                                                |                                                                         |
|                                                     | 34.4                        | 0.48287                                 |                                              |                                                                |                                                                         |
|                                                     | 36.84                       | 0.79919                                 |                                              |                                                                |                                                                         |
|                                                     | 43.41                       | 0.51409                                 |                                              |                                                                |                                                                         |
|                                                     | 47.82                       | 0.69062                                 |                                              |                                                                |                                                                         |
|                                                     | 48.51                       | 2.52653                                 |                                              |                                                                |                                                                         |
|                                                     | 53.34                       | 1.15687                                 |                                              |                                                                |                                                                         |

|                                                                 |         |         |       |          |          |
|-----------------------------------------------------------------|---------|---------|-------|----------|----------|
| <b>2% La-doped<br/>Ag<sub>3</sub>PO<sub>4</sub>/ZnS<br/>QDs</b> | 20.9678 | 2.4621  | 37.80 | 0.010899 | 0.010365 |
|                                                                 | 29.0956 | 0.26778 |       |          |          |
|                                                                 | 31.5821 | 0.05361 |       |          |          |
|                                                                 | 34.4514 | 0.39625 |       |          |          |
|                                                                 | 36.9144 | 0.37353 |       |          |          |
|                                                                 | 43.4197 | 0.55764 |       |          |          |
|                                                                 | 47.7973 | 0.7416  |       |          |          |
|                                                                 | 48.0844 | 0.32601 |       |          |          |
|                                                                 | 53.3002 | 0.32601 |       |          |          |
| <b>6% La-doped<br/>Ag<sub>3</sub>PO<sub>4</sub>/ZnS<br/>QDs</b> | 20.203  | 0.76012 | 21.54 | 0.003808 | 0.007416 |
|                                                                 | 29.0238 | 0.45228 |       |          |          |
|                                                                 | 31.5582 | 0.45951 |       |          |          |
|                                                                 | 34.4753 | 0.56428 |       |          |          |
|                                                                 | 36.8427 | 0.71282 |       |          |          |
|                                                                 | 43.5154 | 0.61419 |       |          |          |
|                                                                 | 47.8212 | 0.2392  |       |          |          |
|                                                                 | 48.8021 | 0.56032 |       |          |          |
|                                                                 | 52.6063 | 0.18996 |       |          |          |

**Table S2: comparison of pore sizes, BET Area , and crystallites sizes**

| <b>Samples</b>                                 | <b>Crystallite sizes (nm)</b> | <b>BET surface area (m<sup>2</sup>/g)</b> | <b>Pore Volume (cc/g)</b> | <b>Pore Radius (Å)</b> |
|------------------------------------------------|-------------------------------|-------------------------------------------|---------------------------|------------------------|
| <b>Pure Ag<sub>3</sub>PO<sub>4</sub></b>       | 158.13                        | 130.109                                   | 0.036                     | 15.578                 |
| <b>2%-La Ag<sub>3</sub>PO<sub>4</sub></b>      | 73.06                         | 89.934                                    | 0.031                     | 15.564                 |
| <b>6%-La Ag<sub>3</sub>PO<sub>4</sub></b>      | 118                           | 133.446                                   | 0.038                     | 15.581                 |
| <b>ZnS QDs</b>                                 | 2.26                          | 116.537                                   | 0.040                     | 15.610                 |
| <b>6%-Ag<sub>3</sub>PO<sub>4</sub>/ZnS QDs</b> | 10.33                         | 141.120                                   | 0.053                     | 14.761                 |

Figure. S2. XPS analysis of (a) C1s, (b) Complete Survey

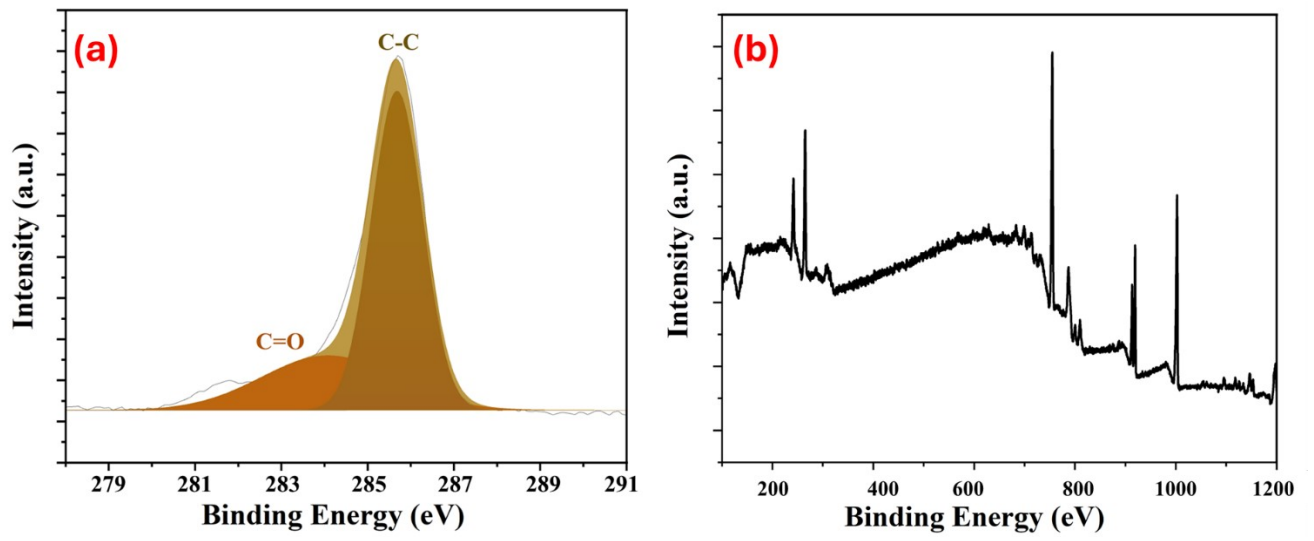

Figure. S3. % adsorption capacities of different nano catalysts.

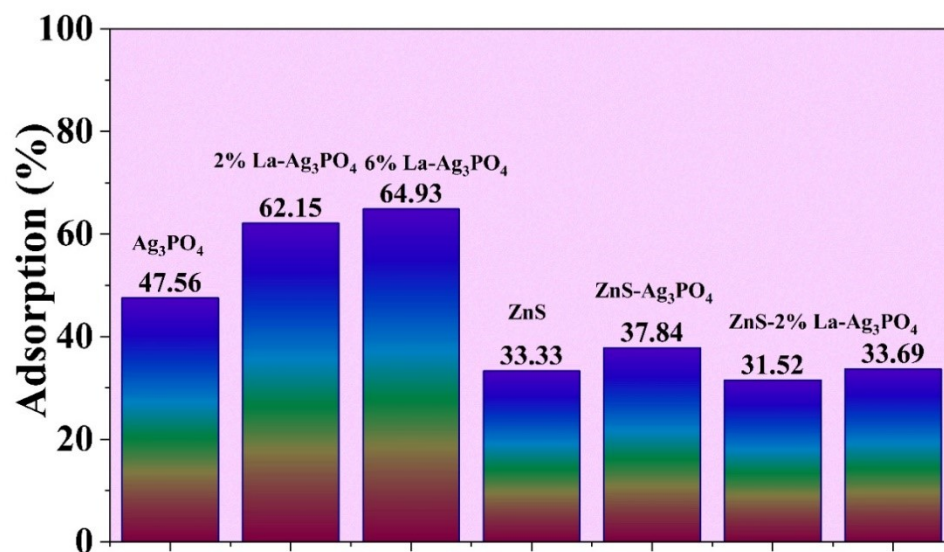

Figure. S4. Change in absorbance of standard dye solution (15 ppm) with time for 6% La-doped  $\text{Ag}_3\text{PO}_4/\text{ZnS}$  Quantum Dots

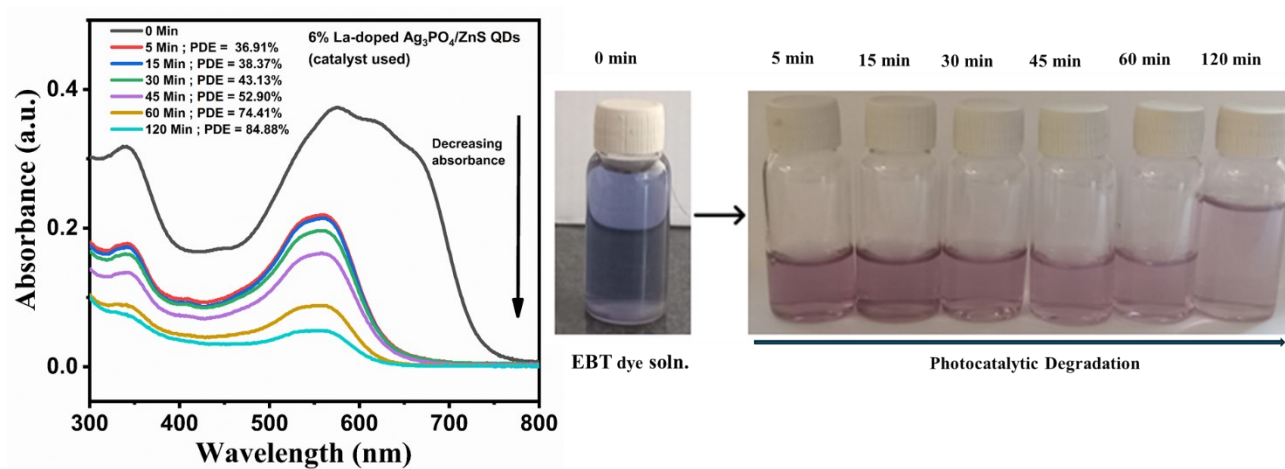

Figure. S5. Effect of initial dye concentration on the photocatalytic degradation of Eriochrome Black T using seven different catalysts

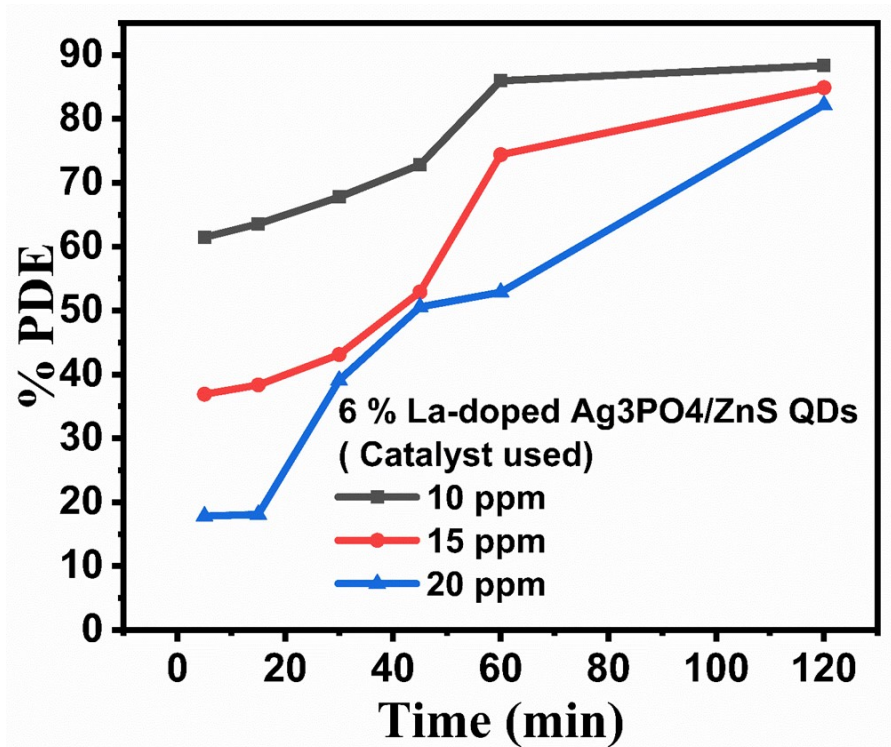

Figure S6: Effect of catalyst loading on the time-dependent photodegradation efficiency of Eriochrome Black T for catalysts, each tested at three dosage levels.

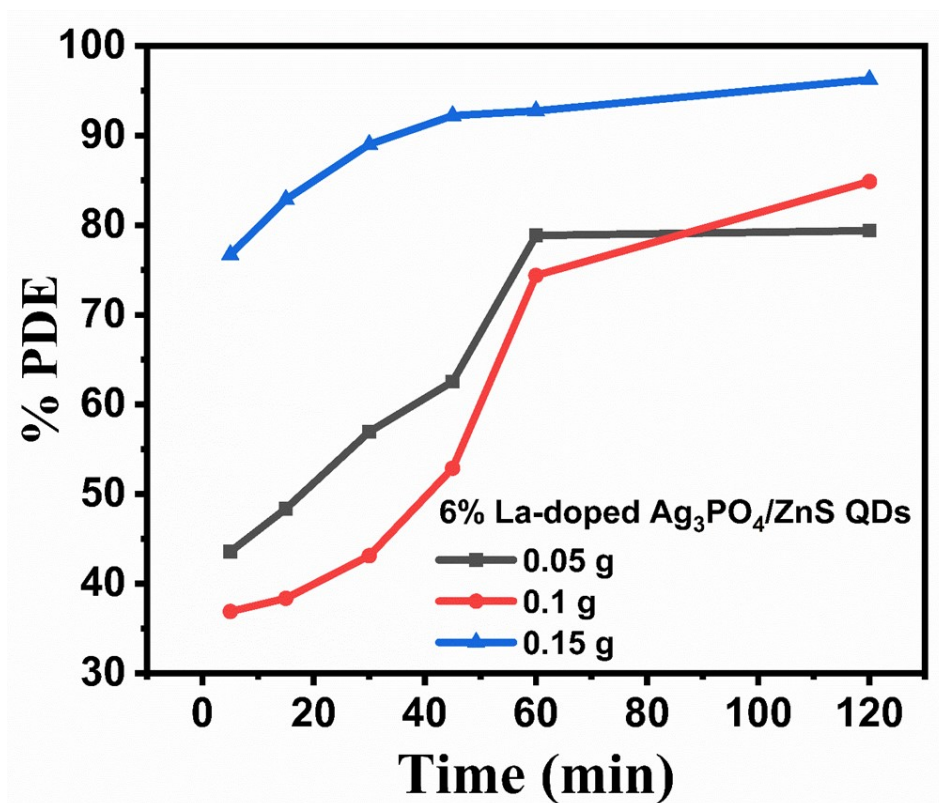

Figure S7 (a-b): Effect of pH on photodegradation efficiency of EBT using two different catalysts, (c-d) Effect of temperature on photodegradation efficiency of EBT using two different catalysts.

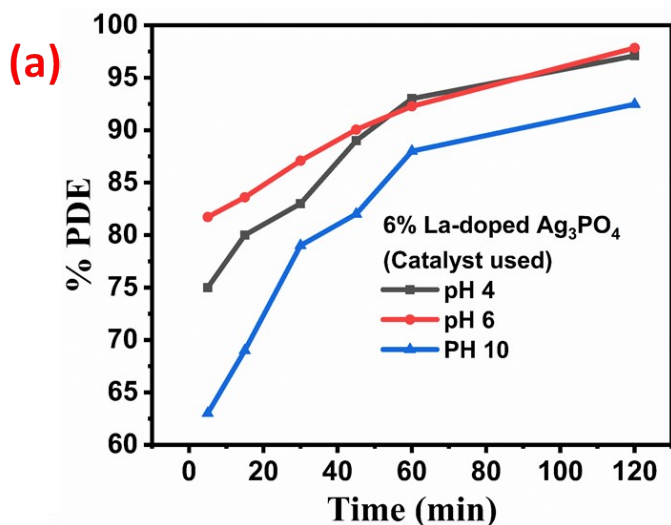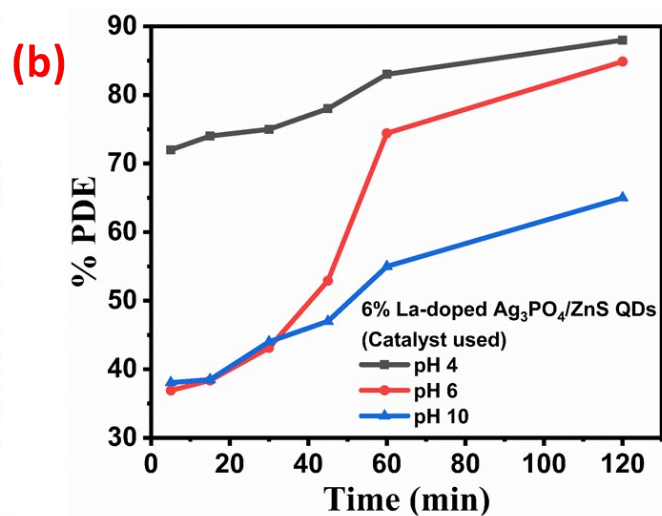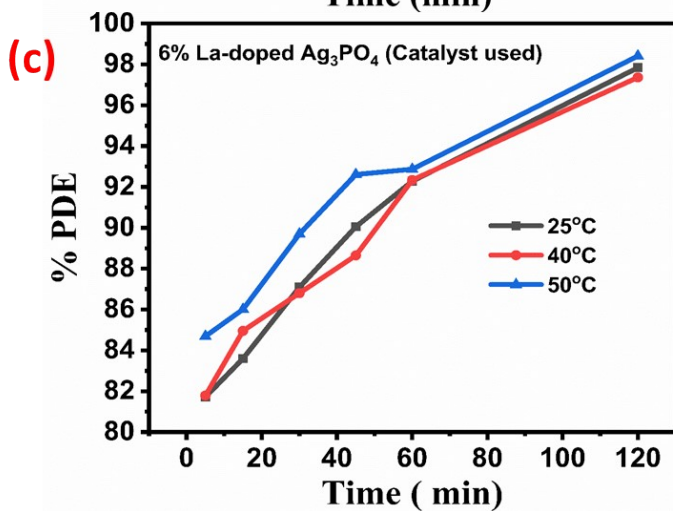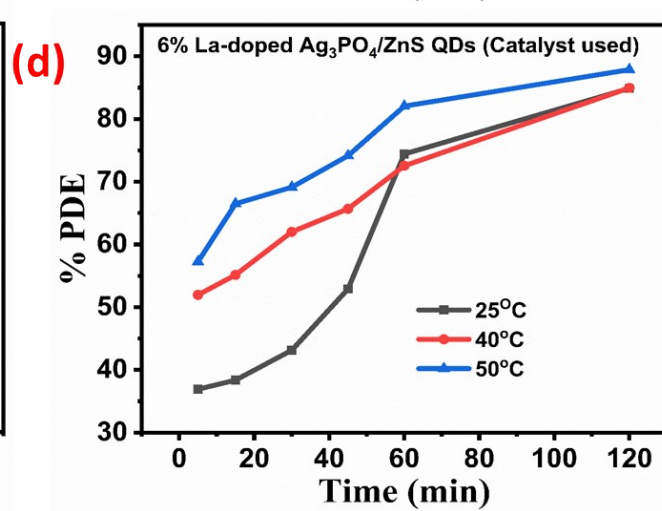

Figure S8: Kinetic study of the photodegradation process of EBT for all catalysts

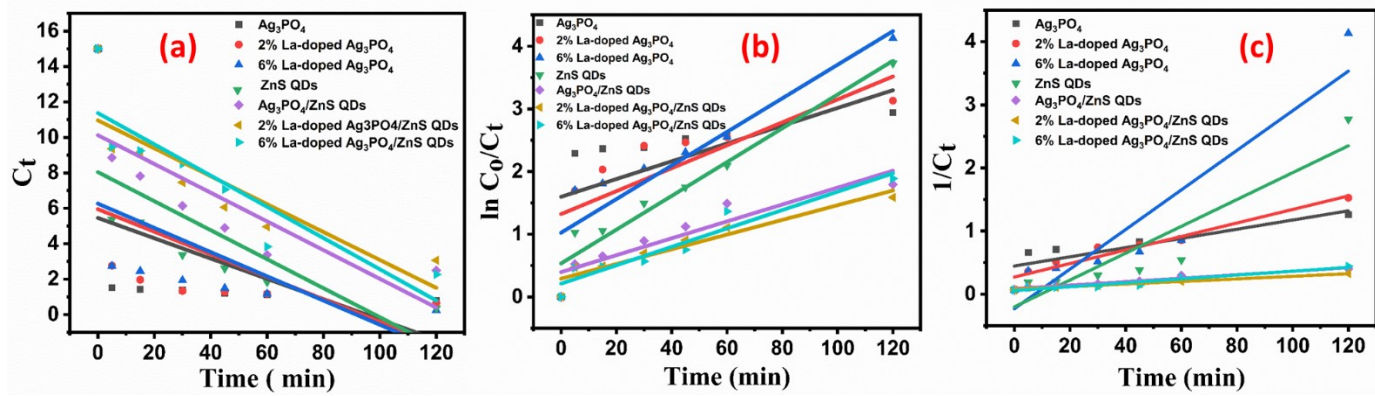

**Table S3** shows recently reported efficiencies of different photocatalysts for Eriochrome Black T (EBT). **6% La-doped Ag<sub>3</sub>PO<sub>4</sub>** and **ZnS QDs** show superior performance under natural sunlight, achieving **97.84%** and **97.59%** degradation of EBT, respectively, in 120 minutes. Compared to reported studies, the high degradation efficiencies of **6% La-doped Ag<sub>3</sub>PO<sub>4</sub>** and **ZnS QDs** under sunlight and moderate reaction time highlight their strong potential for **practical, solar-driven wastewater treatment**, combining both efficiency and operational simplicity.

**Table S3. Comparison of Reported EBT degradation efficiencies of different photocatalyst.**

| Sr. No. | Photocatalyst                                                                                     | Dyes | Light source              | Degradation (%) | Time (min) | References |
|---------|---------------------------------------------------------------------------------------------------|------|---------------------------|-----------------|------------|------------|
| 1       | TiO <sub>2</sub>                                                                                  | EBT  | UV light                  | 82              | 90         | 1          |
| 2       | N-doped TiO <sub>2</sub> (N-TiO <sub>2</sub> )                                                    | EBT  | UV light                  | 62              | 180        | 2          |
| 3       | SnS                                                                                               | EBT  | Sunlight                  | 93              | 120        | 3          |
| 4       | TiO <sub>2</sub> -biochar composite                                                               | EBT  | UV light                  | 99.14           | 124        | 4          |
| 5       | SnS <sub>2</sub>                                                                                  | EBT  | Sunlight                  | 90              | 120        | 3          |
| 6       | CMO NC                                                                                            | EBT  | UV light                  | 95.5            | 120        | 5          |
| 7       | Zn <sub>0.5</sub> Cu <sub>0.5</sub> Fe <sub>2</sub> O <sub>4</sub> /C <sub>3</sub> N <sub>4</sub> | EBT  | Visible light irradiation | 97.08           | 120        | 6          |
| 8       | PVA-Ag:ZnS                                                                                        | EBT  | Sunlight                  | 91              | 80         | 7          |
| 9       | CNT@Nb <sub>2</sub> O <sub>5</sub>                                                                | EBT  | Visible light irradiation | 89.89           | 180        | 8          |
| 10      | TiO <sub>2</sub> /g-C <sub>3</sub> N <sub>4</sub>                                                 | EBT  | UV light                  | 100             | 150        | 9          |
| 11      | Silica-Titania fibers                                                                             | EBT  | UV light                  | 98              | 480        | 10         |
| 12      | Li <sub>2</sub> MnO <sub>3</sub>                                                                  | EBT  | UV light                  | 73              | 60         | 11         |
| 13      | CuAl <sub>2</sub> O <sub>4</sub>                                                                  | EBT  | Sunlight                  | 100             | 180        | 12         |
| 14      | 6% La-doped Ag <sub>3</sub> PO <sub>4</sub>                                                       | EBT  | Sunlight                  | 97.84           | 120        | This study |
| 15      | ZnS QDs                                                                                           | EBT  | Sunlight                  | 97.59           | 120        | This study |
| 16      | 6% La-doped Ag <sub>3</sub> PO <sub>4</sub> /ZnS QDs                                              | EBT  | Sunlight                  | 84.88           | 120        | This Study |

## References

1. Kansal, S. K.; Sood, S.; Umar, A.; Mehta, S. K., Photocatalytic degradation of Eriochrome Black T dye using well-crystalline anatase TiO<sub>2</sub> nanoparticles. *Journal of Alloys and Compounds* **2013**, *581*, 392-397.
2. Sacco, O.; Mancuso, A.; Venditto, V.; Pragliola, S.; Vaiano, V., Behavior of N-doped TiO<sub>2</sub> and N-doped ZnO in photocatalytic azo dye degradation under UV and visible light irradiation: a preliminary investigation. *Catalysts* **2022**, *12* (10), 1208.
3. maamria, J.; Soli, J.; Elaloui, E., Enhanced photocatalytic degradation of rhodamine (RhB) and eriochrome black (EBT) by nanoparticles of SnS and SnS<sub>2</sub> prepared by the sol-gel method. *Journal of Materials Science: Materials in Electronics* **2025**, *36* (34), 2181.
4. Abdu, M.; Tibebe, S.; Babae, S.; Worku, A.; Msagati, T. A.; Nure, J. F., Optimization of photocatalytic degradation of Eriochrome Black T from aqueous solution using TiO<sub>2</sub>-biochar composite. *Results in Engineering* **2025**, *25*, 104036.
5. Sobhani, A.; Rouhani, E.; Mousavi-Kamazani, M., First photocatalytic investigation on Cd-Mn-O nanocomposites for the degradation of Eriochrome Black T. *Applied Water Science* **2025**, *15* (10), 260.
6. Liu, Z.; Liu, J.; Tian, Y.; Hu, Y.; Zou, Q., A novel catalyst ZnO. 5CuO. 5Fe<sub>2</sub>O<sub>4</sub>/C<sub>3</sub>N<sub>4</sub> photocatalytic synergistic activation of persulfate for efficient degradation of Eriochrome black T. *Ceramics International* **2025**, *51* (6), 7411-7419.
7. Sumadevi, K.; Krishnamurthy, G.; Walmik, P.; Rani, R. P.; Naik, S.; Naik, H. B.; Naik, N., Photocatalytic degradation of Eriochrome black-T and Evan's blue dyes under the visible light using PVA capped and uncapped Ag doped ZnS nanoparticles. *Emergent Materials* **2021**, *4* (2), 447-456.
8. Kaufmann, C. G.; Druzian, D. M.; Da Silva, W. L.; Zampiva, R. Y. S.; Rossi, M.; Pavoski, G.; Espinosa, D. C. R.; Alves, A. K.; Bergmann, C. P.; Rhoden, C. R. B., A novel nanocatalyst of the multi-walled carbon nanotubes decorated with niobium pentoxide for the Eriochrome black T dye degradation. *Environmental Science and Pollution Research* **2025**, *32* (34), 20528-20542.
9. Hassan, F.; Bonnet, P.; Dangwang Dikdim, J. M.; Gatcha Bandjoun, N.; Caperaa, C.; Dalhatou, S.; Kane, A.; Zeghioud, H., Synthesis and investigation of TiO<sub>2</sub>/g-C<sub>3</sub>N<sub>4</sub> performance for photocatalytic degradation of bromophenol blue and Eriochrome Black T: experimental design optimization and reactive oxygen species contribution. *Water* **2022**, *14* (20), 3331.
10. Aldama-Huerta, O. A.; Medellín-Castillo, N. A.; Carrasco Marín, F.; Reyes-López, S. Y., Photocatalytic Degradation of Methyl Orange, Eriochrome Black T, and Methylene Blue by Silica-Titania Fibers. *Applied Sciences* **2025**, *15* (22), 12084.
11. Alabi, A. B.; Villani, M.; Sinisi, V.; Rampino, S.; Coppede, N.; Adebayo, S.; Adegoke, H. I.; Akinsola, S. I., Lithium Manganese Oxide (Li<sub>2</sub>MnO<sub>3</sub>) as a promising photocatalyst for the degradation of Eriochrome Black T. *Journal of Materials Science: Materials in Engineering* **2025**, *20* (1), 61.
12. Lahmar, H.; Douafer, S.; Laouici, R.; Hamdi, M.; Souici, A.; Trari, M.; Benamira, M., Synthesis and characterization of CuAl<sub>2</sub>O<sub>4</sub> nanoparticles: Application for the removal of Eriochrome Black T under solar light irradiation. *Inorganic Chemistry Communications* **2024**, *163*, 112316.
